# Supplementary material for: Unravelling the history of hepatitis B virus genotypes A and D infection using a full-genome phylogenetic and phylogeographic approach
Source: eLife journal article supplement (doi:10.7554/elife.36709), 2018-08-06
Supplement: supp [file elife-36709-supp-v1.zip]

Archive with 12 entries (12 files):
- elife_poa_e36709_Figure_3_figure_supplement_1.tif
- elife_poa_e36709_Supplementary_File_2.docx
- elife_poa_e36709_Supplementary_File_5.docx
- elife_poa_e36709_Supplementary_File_3.docx
- elife_poa_e36709_Figure_2_figure_supplement_1.tif
- elife_poa_e36709_Supplementary_File_4.docx
- elife_poa_e36709_Supplementary_File_1.docx
- elife_poa_e36709_Supplementary_File_6.docx
- elife_poa_e36709_Figure_1_figure_supplement_2.tif
- elife_poa_e36709_Figure_1_figure_supplement_1.tif
- elife_poa_e36709_Figure_1_figure_supplement_3.tif
- elife_poa_e36709_Transparent_Reporting_File.pdf
