# Supplementary figures and images for: Unravelling the history of hepatitis B virus genotypes A and D infection using a full-genome phylogenetic and phylogeographic approach
Source: eLife journal article supplement (doi:10.7554/elife.36709), 2018-08-06

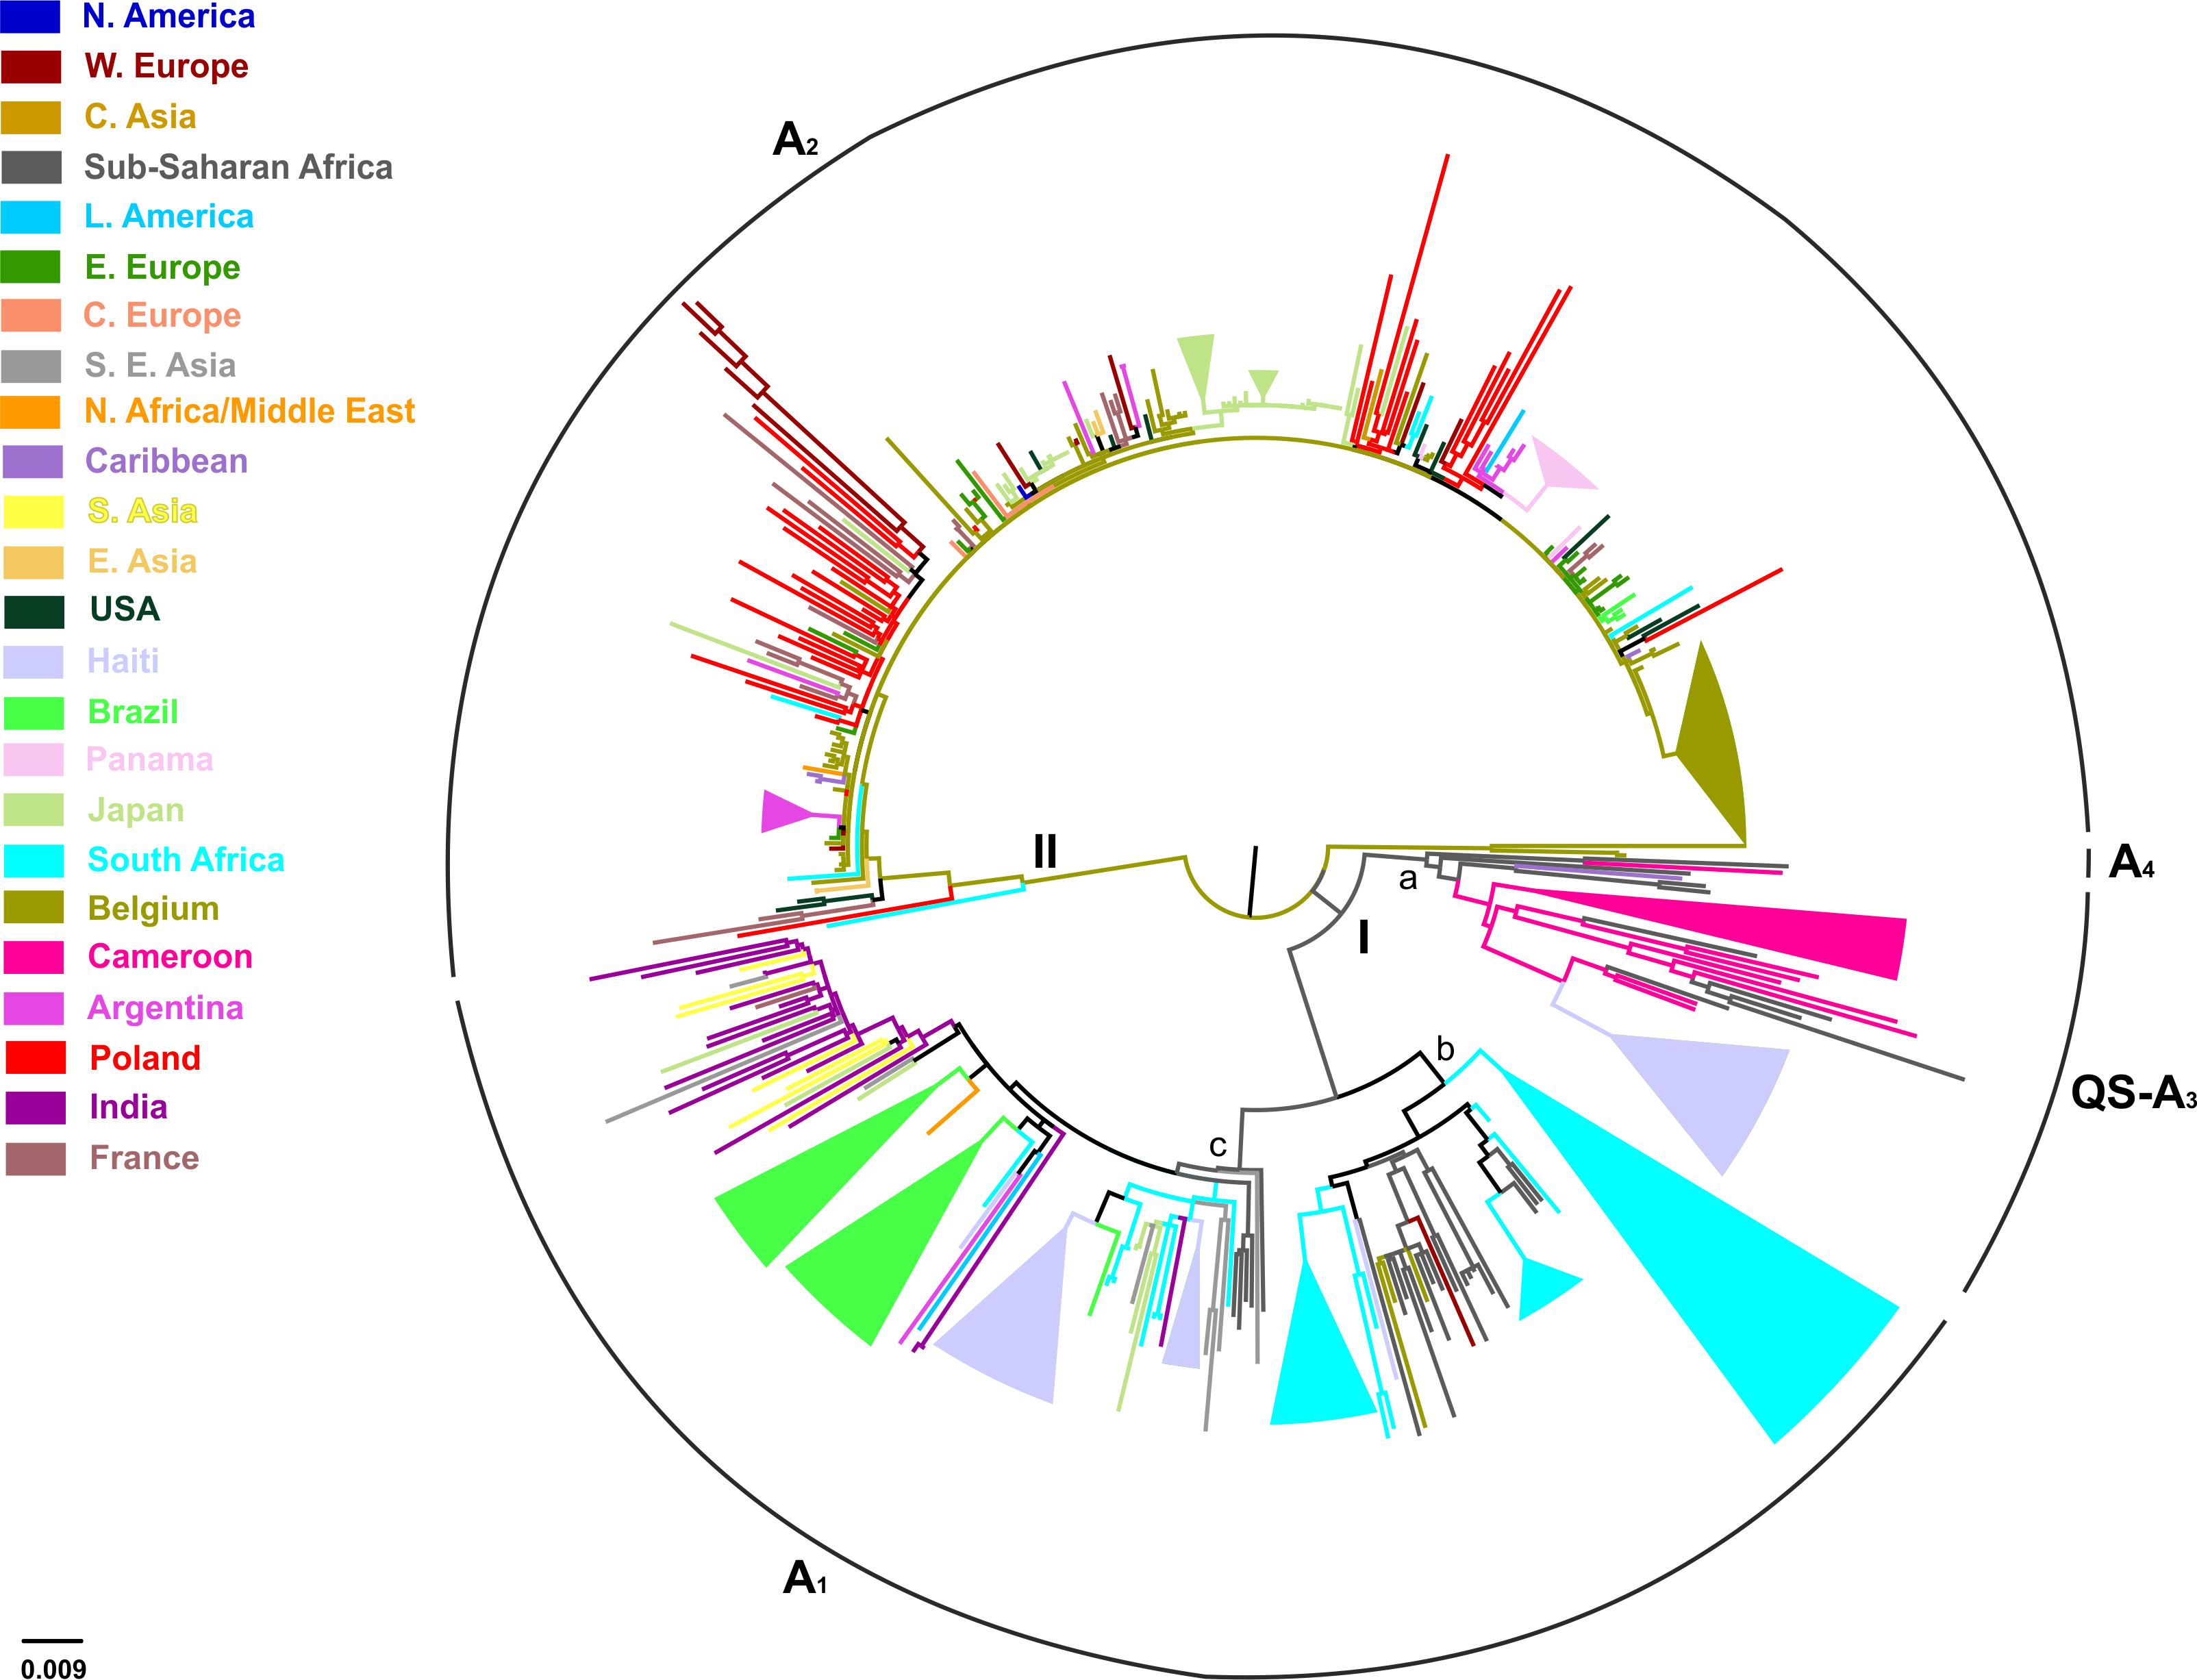

Supplement: supp [file elife-36709-supp-v1.zip › elife_poa_e36709_Figure_3_figure_supplement_1.tif]

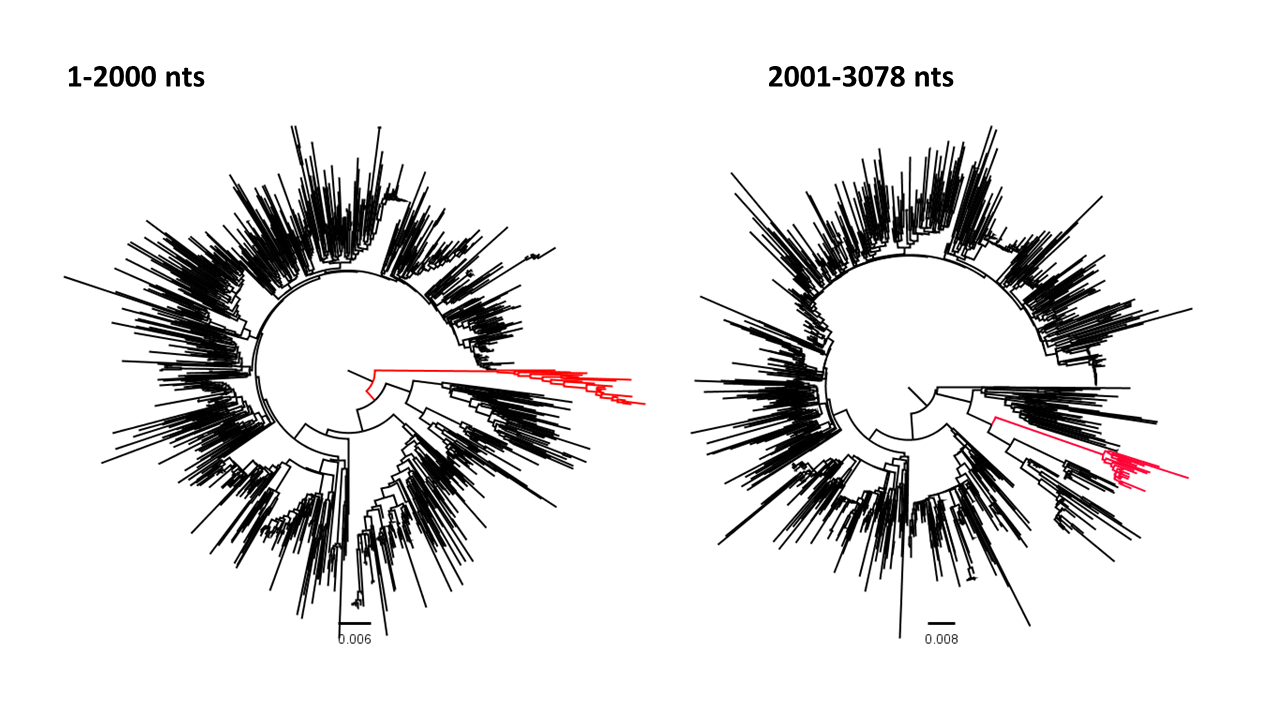

Supplement: supp [file elife-36709-supp-v1.zip › elife_poa_e36709_Figure_2_figure_supplement_1.tif]

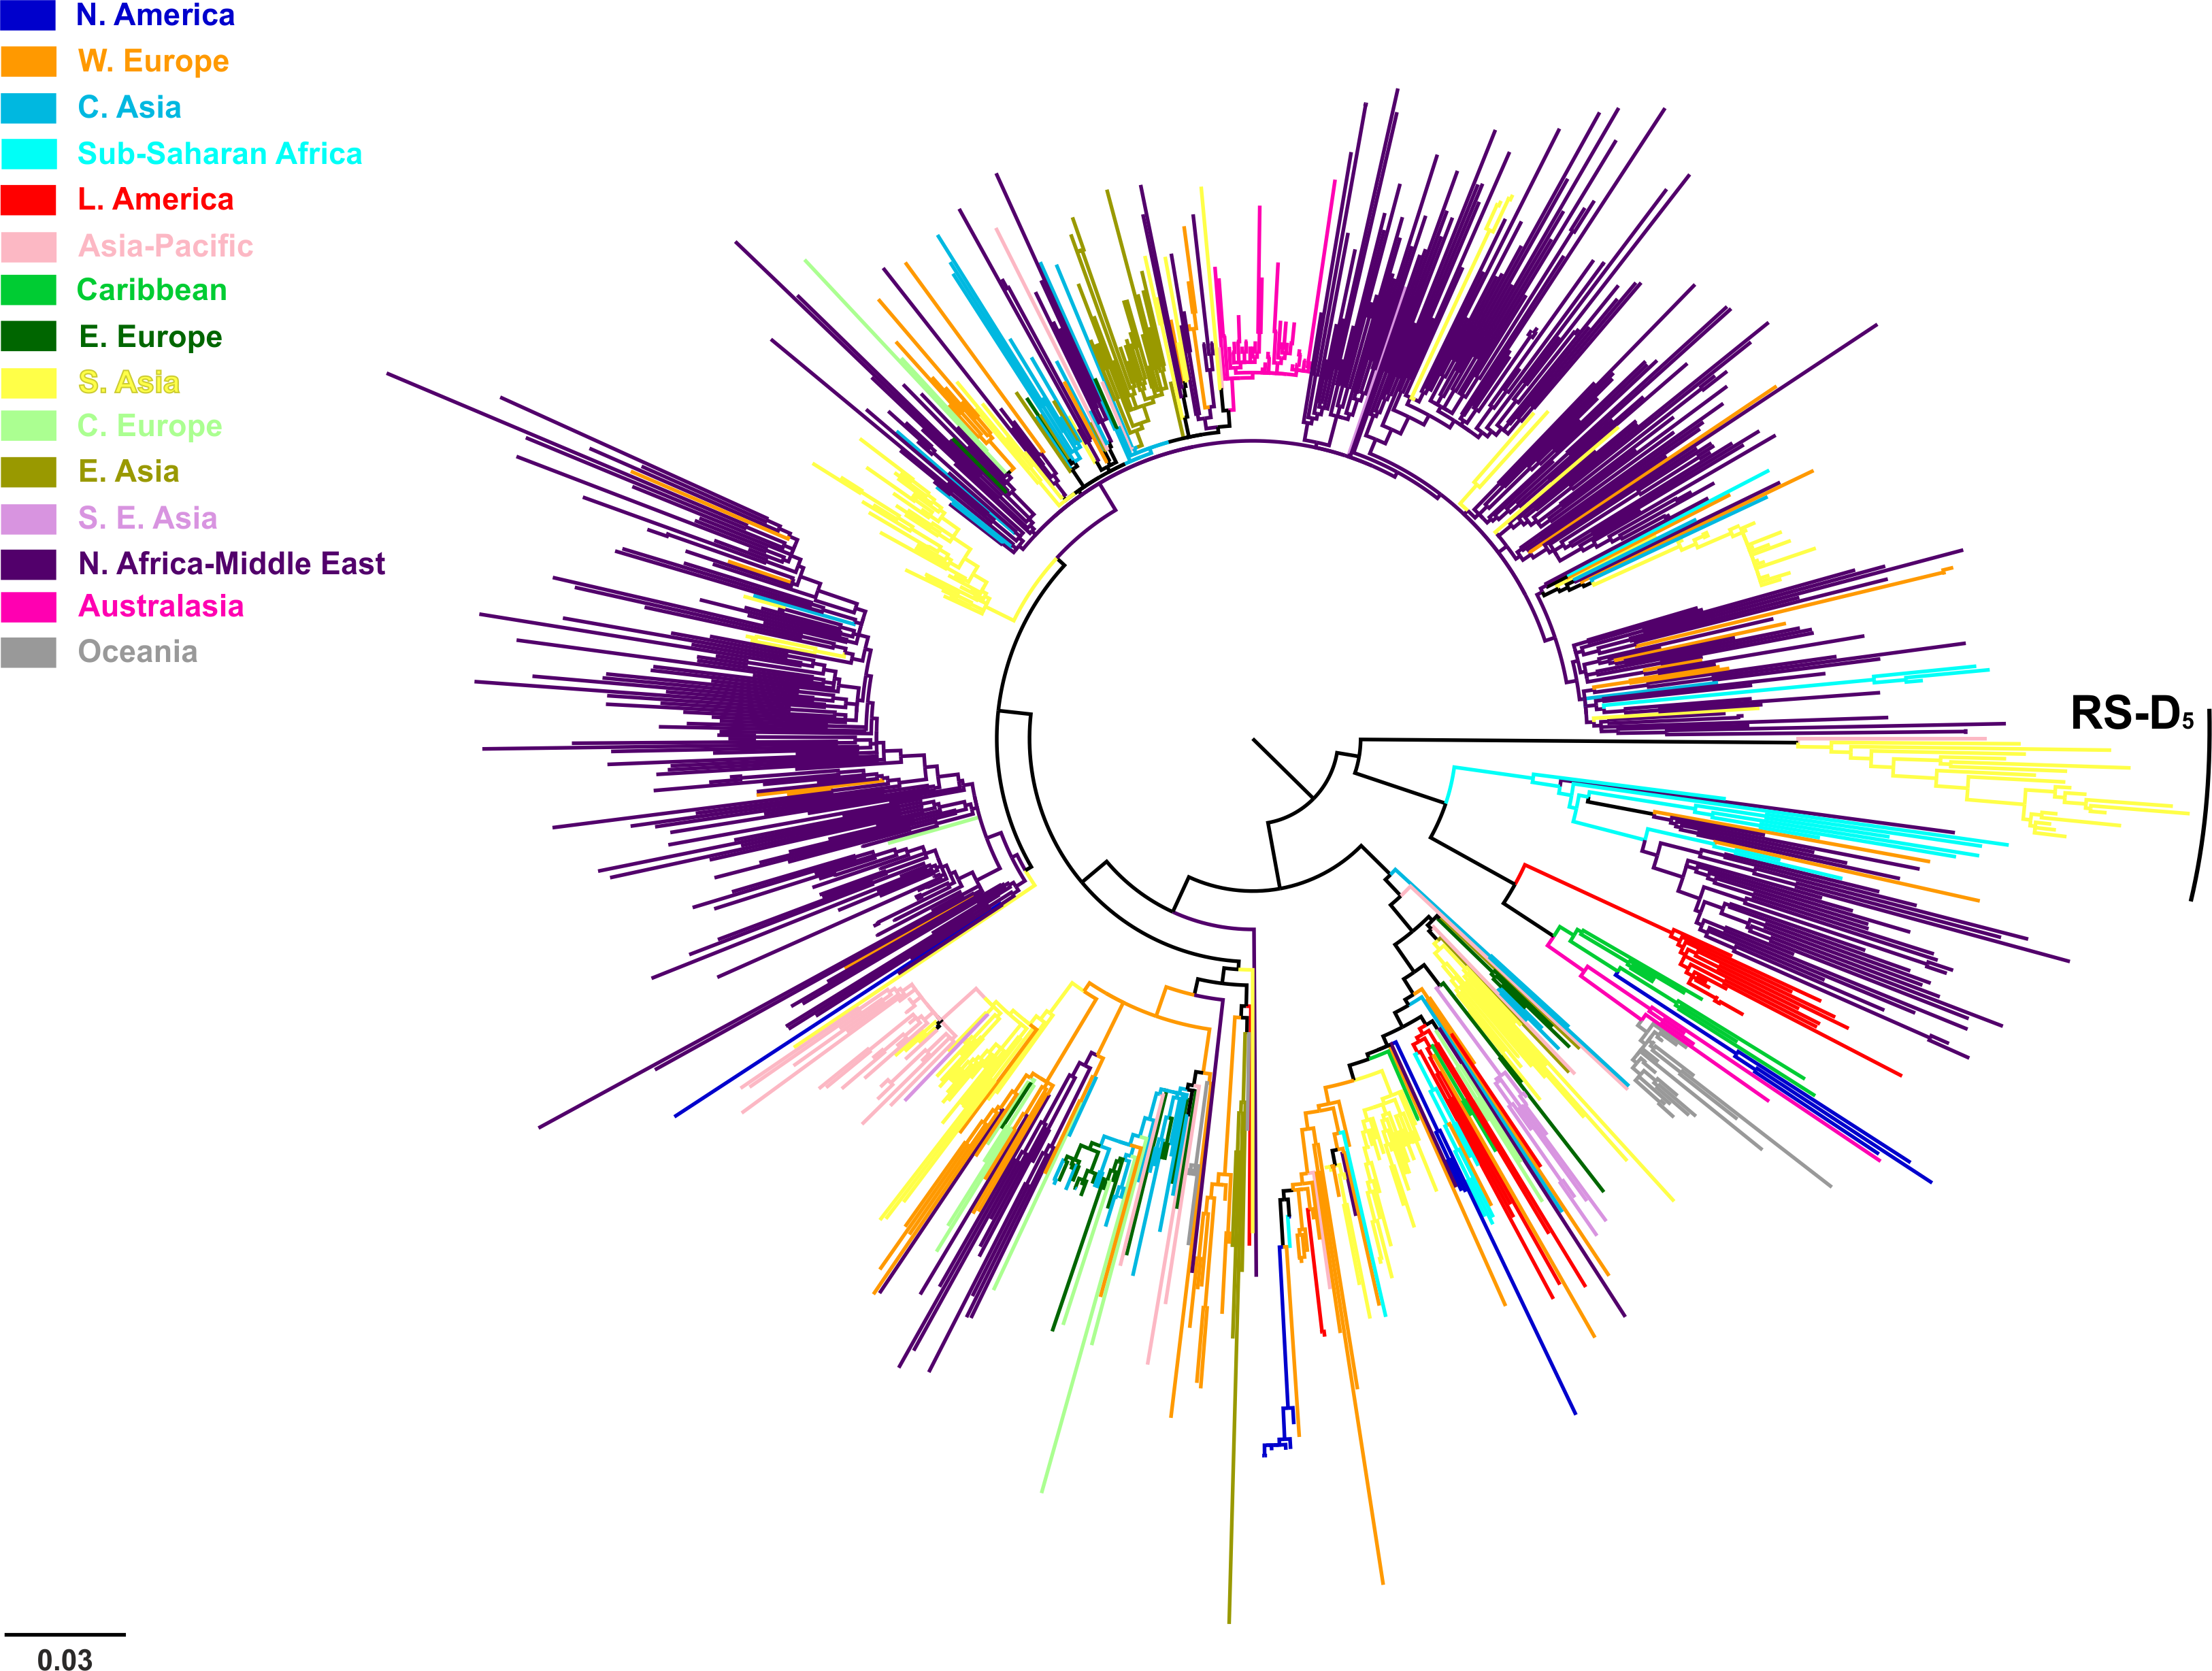

Supplement: supp [file elife-36709-supp-v1.zip › elife_poa_e36709_Figure_1_figure_supplement_2.tif]

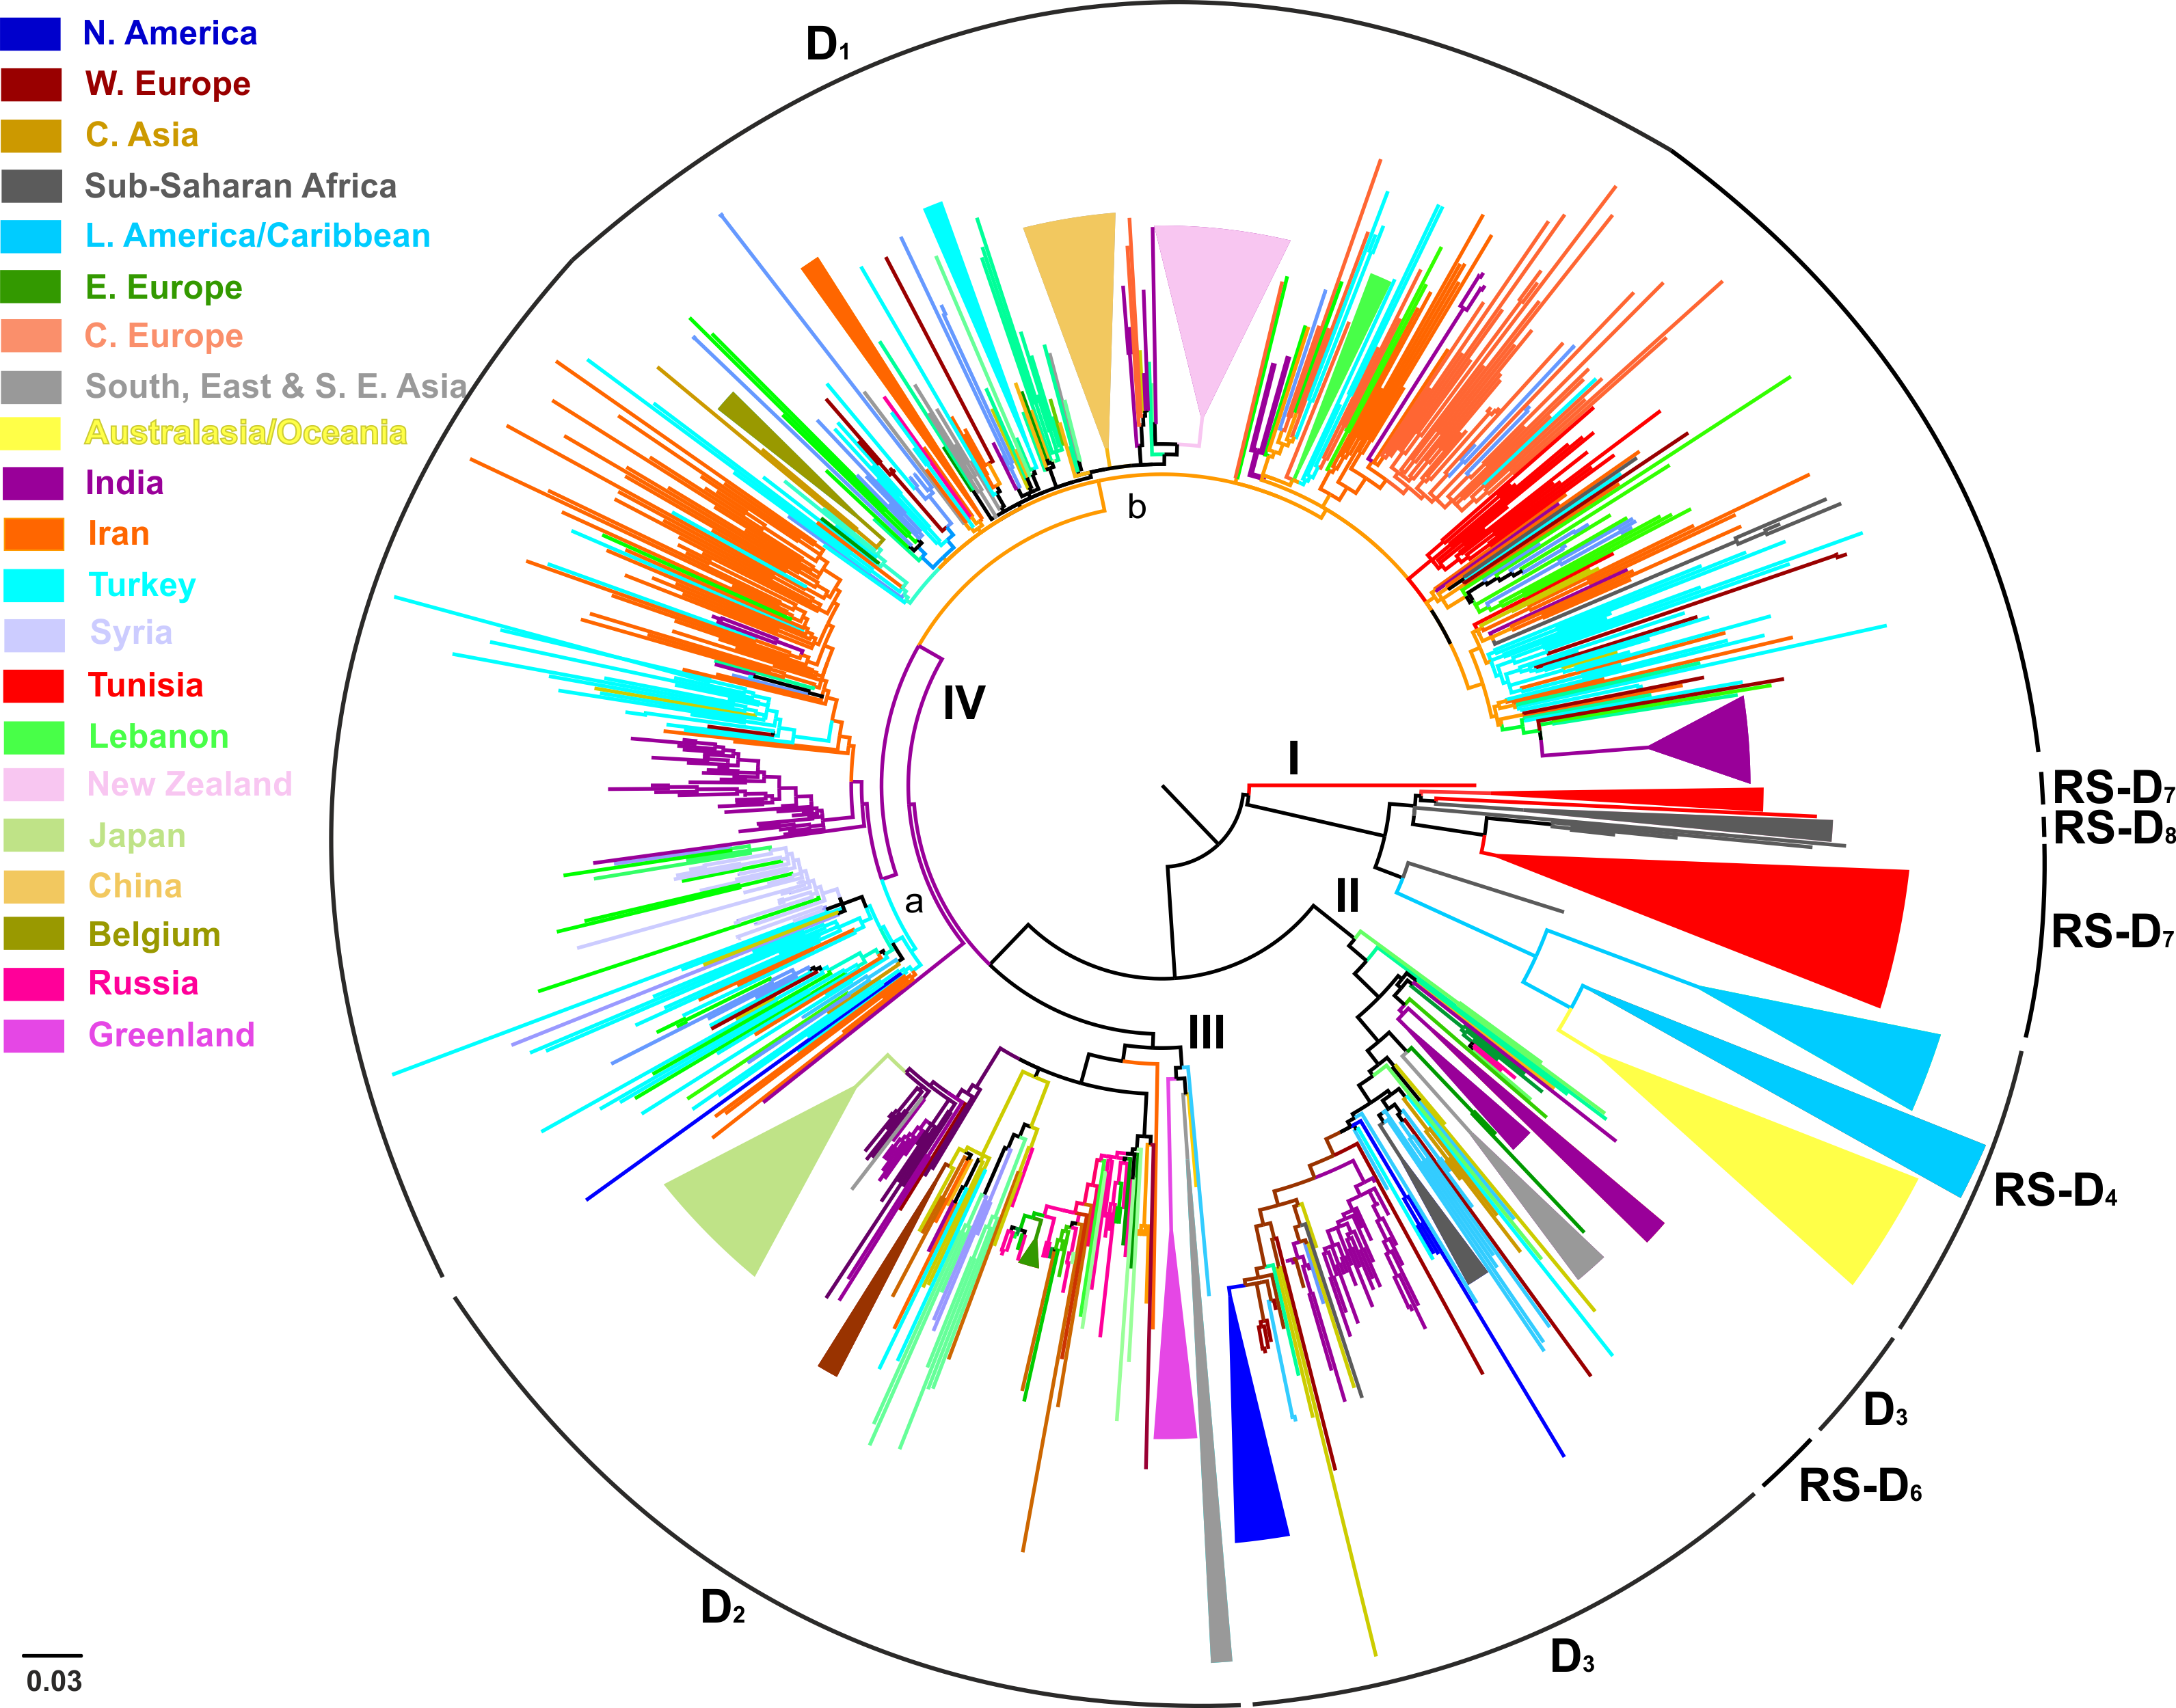

Supplement: supp [file elife-36709-supp-v1.zip › elife_poa_e36709_Figure_1_figure_supplement_1.tif]

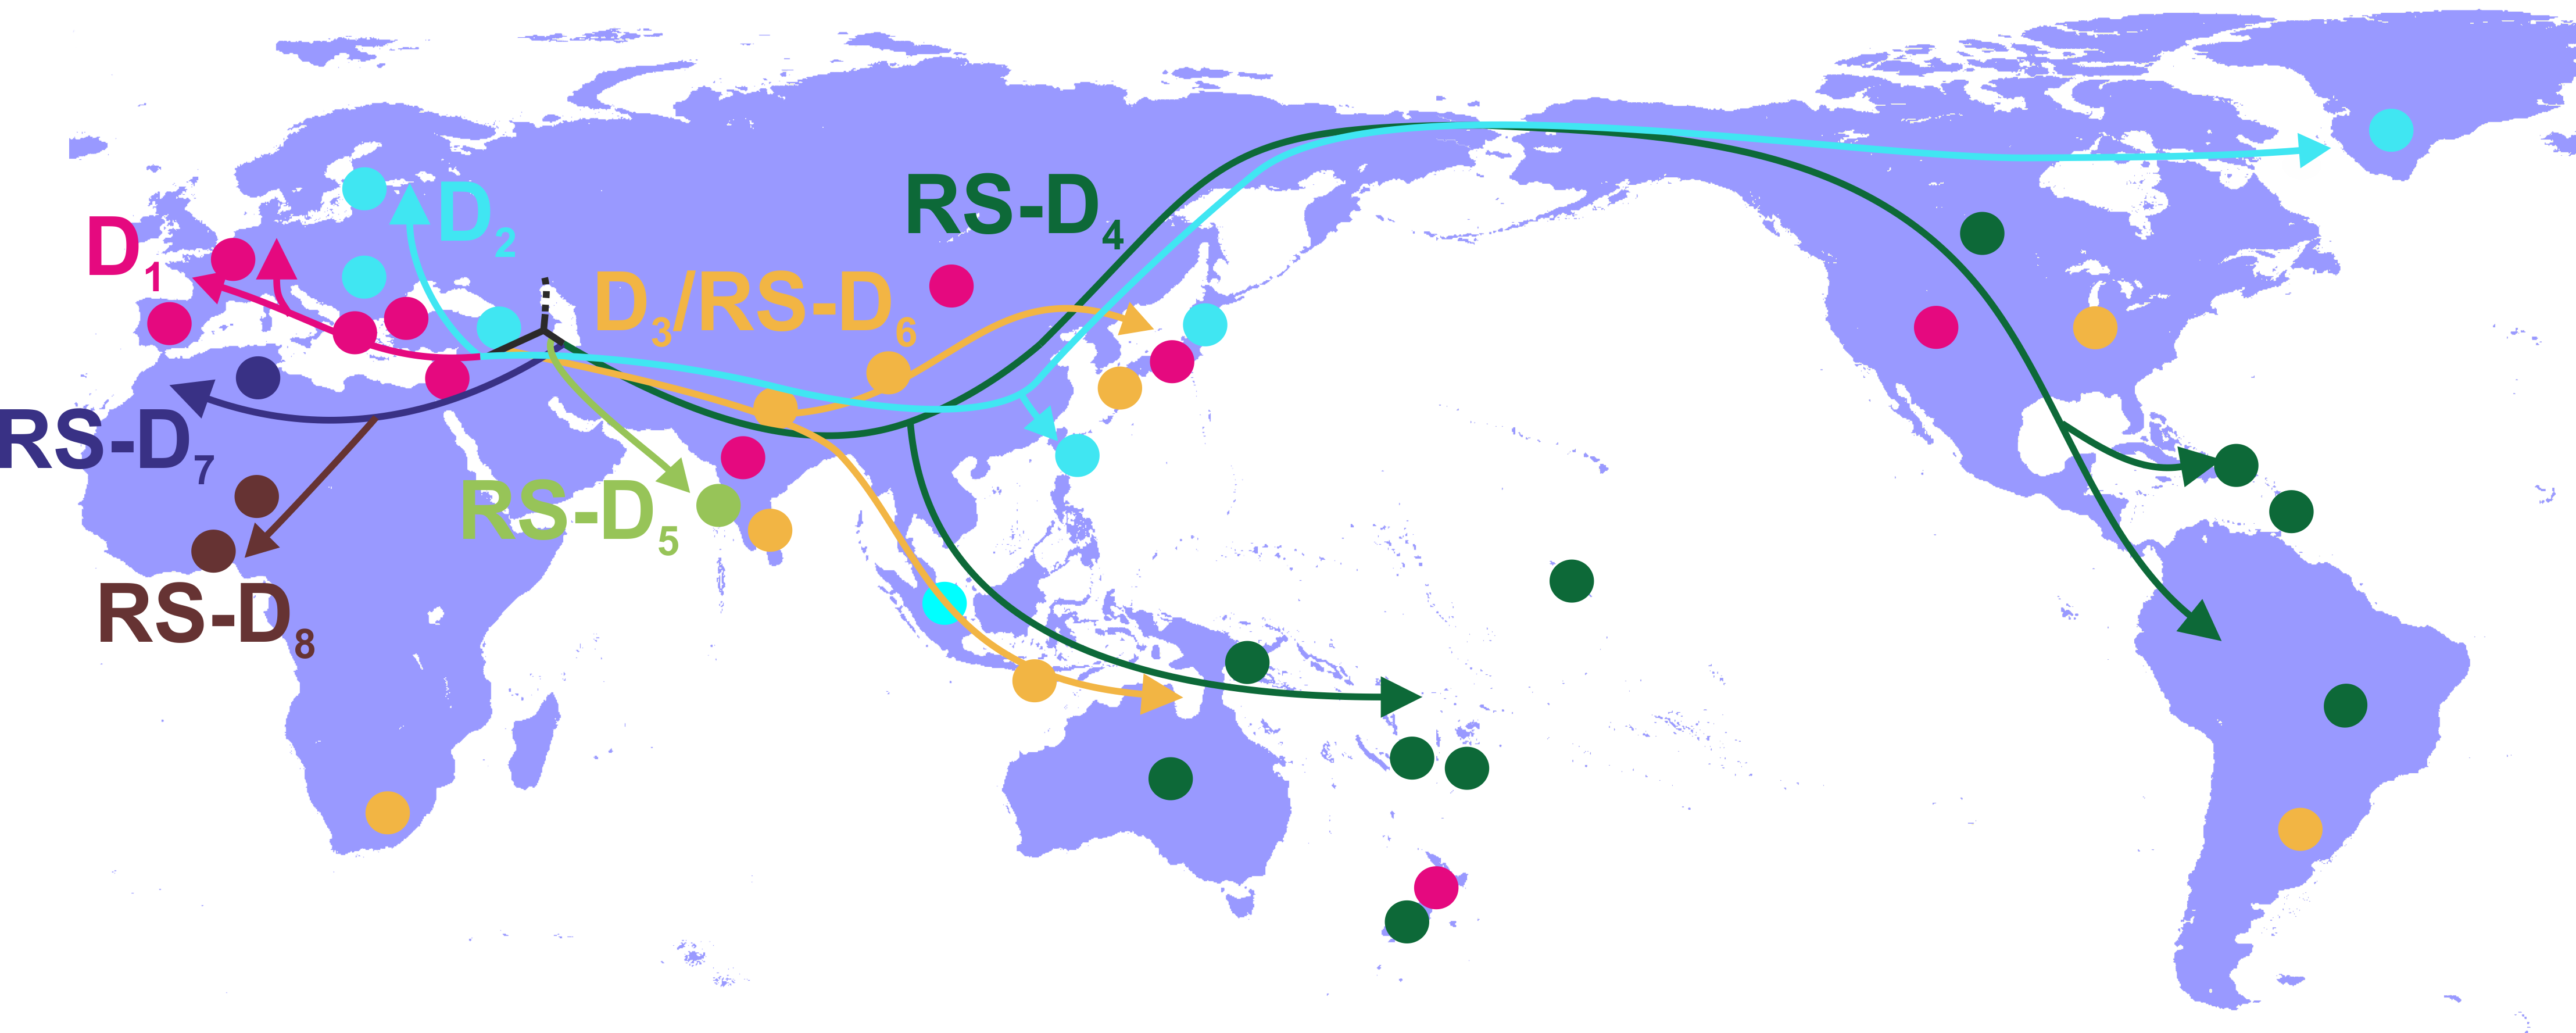

Supplement: supp [file elife-36709-supp-v1.zip › elife_poa_e36709_Figure_1_figure_supplement_3.tif]
